# Supplementary material for: MVA Vectored Vaccines Encoding Rift Valley Fever Virus Glycoproteins Protect Mice against Lethal Challenge in the Absence of Neutralizing Antibody Responses
Source: PubMed Central journal article supplement (PMC7157666; doi:10.3390/vaccines8010082), 2020-02-12
Supplement: vaccines-08-00082-s001.pdf [file vaccines-08-00082-s001.pdf]

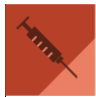

Supplementary Material

Supplementary Table S1. Primers used for inverse PCR reaction

| Name            | 5'-3' sequence              | M-segment nucleotide positions (DQ380208.1) |
|-----------------|-----------------------------|---------------------------------------------|
| end gn reverse  | [Phos]GTGACACTGGTAATTTATCAG | 1760-1739                                   |
| startpb9 fwd:   | TCCTACATACCATCTGCC          |                                             |
| endtpa reverse: | AGATCCTCTTCTGAATCG          |                                             |
| startgc fwd:    | [Phos]TGTTTCAGAACTGATTCAGG  | 2091-2109                                   |

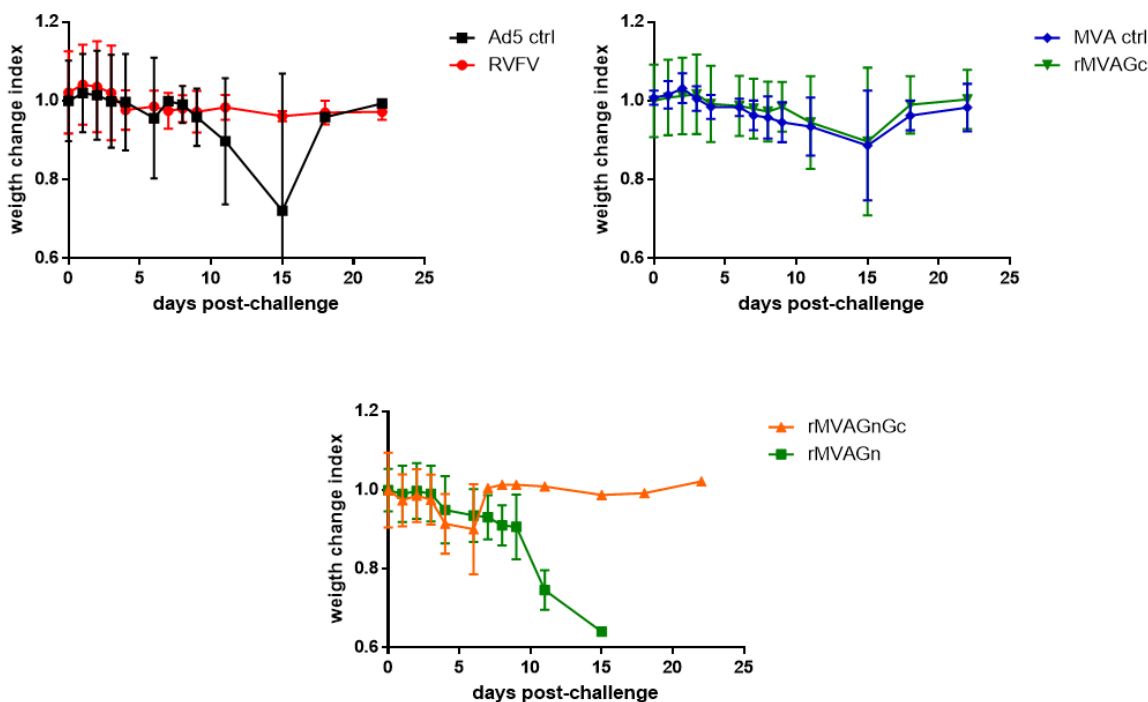

Supplementary Figure S1- Weight loss after passive transfer in mice

*Amino acid sequence of eGn encoded by rMVAGn*

**MDAMKRGLCCVLLLCGAVFVSPSQEIHARFRRGSMAGIAMTVLPALAVFALAPVVFAEDPHL**  
**RNRPGKGHNYIDGMTQEDATCKPVTYAGACSSFDVLEKGGKFLFQ<sup>SYAHHRTLL</sup>EAVHDTIIAKADP**  
**PSCDLLSAHGPNPCMKKEKLVKTHCPNNYQSAHHLNNDGKMASVKCPPKYELTEDCNFCRQM**  
**TGASLKKGSYPLQDLFCQSEDDGSKLKTMMKGVCEVGVQALKKCDGQLSTAHEVVPFAVFNKNS**  
**KKVYLDKLDLKTENLLPDSFVCFEHKGGYKGTMDFGQTKRELKSFDISQCPKIGGHGSKKCTGD**  
**AAFCSAYECTAQYANAYCSHANGSGIVQIQVSGVWKKPLCVGYERVVVKRELSAKPIQRVEPCT**  
**TCITKCEPHGLVVRSTGFKISSAVACASGVCVTGSQSPSTEITLKYPGISQSSGGDIGVHMAHDDQS**  
**VSSKIVAHCPPQDPCLVHDCIVCAHGLINYQCHSYIPSAEKIIPNPLLGLD**

*Amino acid sequence of Gc encoded by rMVAGc*

**MDAMKRGLCCVLLLCGAVFVSPSQEIHARFRRGSCSELIQASSRITTCSTEGVNTKCRLSGTALI**  
**RAGSVGAEACLMLKGVKEDQTKFLKLTVSSSELSCREGQSYWTGSFSPKCLSSRRCHLVGECHVN**  
**RCLSWRDNETSAEFSFVGESTTMRENKCFEQCGGWGCGCFNVNPSCLFVHTYLQSVRKEALRVF**  
**NCIDWVHKLTLTIDFDGVSSTIDLGASSRFTNWGSVLSLDAEGISGSNSFSFIESPGKGYAIVDE**  
**PFSEIPRQGLGEIRCNESSVLSAHESCLRAPNLI<sup>SYKPMIDQL</sup>ECTTNLIDPFVVFERGLPQTRNDKTF**  
**AASKGNRGVQAFSKGSVQADLTLMFDNFEVDFVGAAVSCDAAFLNLTGCYSCNAGARVCLSITS**  
**TGTGSLSAHNKDGSLHIVLPSENGTKDQCQLHFTVPEVEEEFMYSCDGDERPLLVKGTLIAIDPF**  
**DDRREAGGESTVVNPKSGSWNFFDWFSGLMSWF<sup>GGPLKTILL</sup>ICLYVALSIGLFFLLIYLLGGTGLSKMW**  
**LAATKASRSSYIPSAEKIIPNPLLGLD**

**Supplementary Figure S2-** Amino acid sequences of eGn and Gc encoded by the recombinant MVAs. **Bold:** N-terminal tPA leader sequence and C-terminal tag pb9/V5 epitope. Underlined: putative transmembrane-cytoplasmic tail of Gc. <sup>Superscript:</sup> class-I MHC peptides used in this work
